# Supplementary material
Source: PubMed Central journal article supplement (PMC6287914)
Supplement: NIHMS988603-supplement-Supplement.pdf [file NIHMS988603-supplement-Supplement.pdf]

| GO term                                                     | GO term ID | GO functional classification | Number of input genes represented by GO term (total: n=61) | Percentage of input genes represented by GO term | PValue     | Genes                                                                                                                                     | Population hits | Population total | Fold Enrichment | Bonferroni  | Benjamini   | FDR        |
|-------------------------------------------------------------|------------|------------------------------|------------------------------------------------------------|--------------------------------------------------|------------|-------------------------------------------------------------------------------------------------------------------------------------------|-----------------|------------------|-----------------|-------------|-------------|------------|
| lipid metabolic process                                     | GO:0006629 | biological process           | 21                                                         | 33.87096774                                      | 1.88E-08   | PLP1, PSAP, FA2H, ABCD1, HEXA, TTPA, MECP2, STUB1, PNPLA6, GLB1, AUH, CYP7B1, GBA2, NPC1, NPC2, CYP27A1, ARSA, GALC, PLA2G6, ABHD12, PDHX | 1332            | 16651            | 4.303537144     | 3.50E-05    | 3.50E-05    | 3.20E-05   |
| carboxylic acid metabolic process                           | GO:0019752 | biological process           | 15                                                         | 24.19354839                                      | 1.04E-06   | PLP1, FA2H, ABCD1, MECP2, DARS2, AUH, SDHA, CYP7B1, GBA2, NPC1, CYP27A1, SLC2A1, MARS2, PDHX, SLC25A15                                    | 828             | 16651            | 4.945058209     | 0.001930423 | 9.66E-04    | 0.00176847 |
| oxoacid metabolic process                                   | GO:0043436 | biological process           | 15                                                         | 24.19354839                                      | 1.11E-06   | PLP1, FA2H, ABCD1, MECP2, DARS2, AUH, SDHA, CYP7B1, GBA2, NPC1, CYP27A1, SLC2A1, MARS2, PDHX, SLC25A15                                    | 833             | 16651            | 4.915375986     | 0.002073496 | 6.92E-04    | 0.00189968 |
| sphingolipid metabolic process                              | GO:0006665 | biological process           | 8                                                          | 12.90322581                                      | 1.35E-06   | GBA2, PSAP, FA2H, HEXA, ARSA, GALC, PLA2G6, GLB1                                                                                          | 155             | 16651            | 14.08863035     | 0.002512775 | 6.29E-04    | 0.00230263 |
| organic acid metabolic process                              | GO:0006082 | biological process           | 15                                                         | 24.19354839                                      | 3.28E-06   | PLP1, FA2H, ABCD1, MECP2, DARS2, AUH, SDHA, CYP7B1, GBA2, NPC1, CYP27A1, SLC2A1, MARS2, PDHX, SLC25A15                                    | 913             | 16651            | 4.484674914     | 0.006087162 | 0.001220408 | 0.00558802 |
| glycosphingolipid metabolic process                         | GO:0006687 | biological process           | 6                                                          | 9.677419355                                      | 5.96E-06   | GBA2, PSAP, HEXA, ARSA, GALC, GLB1                                                                                                        | 72              | 16651            | 22.74726776     | 0.01104261  | 0.001848961 | 0.01016223 |
| membrane lipid metabolic process                            | GO:0006643 | biological process           | 8                                                          | 12.90322581                                      | 8.33E-06   | GBA2, PSAP, FA2H, HEXA, ARSA, GALC, PLA2G6, GLB1                                                                                          | 204             | 16651            | 10.70459659     | 0.015398325 | 0.002214417 | 0.01420163 |
| axo-dendritic transport                                     | GO:0008088 | biological process           | 5                                                          | 8.064516129                                      | 1.03E-05   | SPG7, KIF1A, OPA1, UCHL1, SPG11                                                                                                           | 38              | 16651            | 35.91673857     | 0.018930742 | 0.002386176 | 0.01749055 |
| cellular lipid metabolic process                            | GO:0044255 | biological process           | 15                                                         | 24.19354839                                      | 1.59E-05   | PLP1, PSAP, FA2H, ABCD1, HEXA, MECP2, PNPLA6, GLB1, AUH, GBA2, ARSA, GALC, PLA2G6, ABHD12, PDHX                                           | 1048            | 16651            | 3.90697347      | 0.029207224 | 0.003288165 | 0.02712579 |
| cytoskeleton-dependent intracellular transport              | GO:0030705 | biological process           | 6                                                          | 9.677419355                                      | 2.32E-05   | KIF1C, SPG7, KIF1A, OPA1, UCHL1, SPG11                                                                                                    | 95              | 16651            | 17.24003451     | 0.042245922 | 0.004307121 | 0.0394974  |
| glycolipid metabolic process                                | GO:0006664 | biological process           | 6                                                          | 9.677419355                                      | 6.57E-05   | GBA2, PSAP, HEXA, ARSA, GALC, GLB1                                                                                                        | 118             | 16651            | 13.8796888      | 0.115170852 | 0.011062061 | 0.1119255  |
| liposaccharide metabolic process                            | GO:1903509 | biological process           | 6                                                          | 9.677419355                                      | 7.40E-05   | GBA2, PSAP, HEXA, ARSA, GALC, GLB1                                                                                                        | 121             | 16651            | 13.53556429     | 0.128801124 | 0.011424654 | 0.12611689 |
| single-organism behavior                                    | GO:0044708 | biological process           | 9                                                          | 14.51612903                                      | 1.11E-04   | NPC1, FXN, PSEN1, KCNA2, UCHL1, MECP2, PLA2G6, ABHD12, PRNP                                                                               | 413             | 16651            | 5.948438058     | 0.186465008 | 0.015749001 | 0.18869441 |
| transmembrane transport                                     | GO:0055085 | biological process           | 15                                                         | 24.19354839                                      | 1.99E-04   | KCND3, ABCD1, KCNA2, AFG3L2, GJC2, ATP13A2, SLC17A5, PSEN1, PEX16, SLC2A1, GRID2, PLA2G6, SCN8A, PRNP, SLC25A15                           | 1322            | 16651            | 3.097207411     | 0.309653912 | 0.026121504 | 0.3385752  |
| adult walking behavior                                      | GO:0007628 | biological process           | 4                                                          | 6.451612903                                      | 2.25E-04   | NPC1, FXN, UCHL1, ABHD12                                                                                                                  | 33              | 16651            | 33.08693492     | 0.342087601 | 0.027526285 | 0.38245844 |
| walking behavior                                            | GO:0090659 | biological process           | 4                                                          | 6.451612903                                      | 2.25E-04   | NPC1, FXN, UCHL1, ABHD12                                                                                                                  | 33              | 16651            | 33.08693492     | 0.342087601 | 0.027526285 | 0.38245844 |
| axonal transport                                            | GO:0098930 | biological process           | 4                                                          | 6.451612903                                      | 2.25E-04   | SPG7, KIF1A, OPA1, UCHL1                                                                                                                  | 33              | 16651            | 33.08693492     | 0.342087601 | 0.027526285 | 0.38245844 |
| adult locomotory behavior                                   | GO:0008344 | biological process           | 5                                                          | 8.064516129                                      | 2.48E-04   | NPC1, FXN, UCHL1, MECP2, ABHD12                                                                                                           | 85              | 16651            | 16.05689489     | 0.370080579 | 0.028472021 | 0.42209245 |
| regulation of autophagy                                     | GO:0010506 | biological process           | 7                                                          | 11.29032258                                      | 4.05E-04   | GFAP, NPC1, PSAP, UCHL1, POLR3A, ATP13A2, CAPN1                                                                                           | 269             | 16651            | 7.103236029     | 0.530059375 | 0.03448381  | 0.68875209 |
| establishment of localization by movement along microtubule | GO:0010970 | biological process           | 5                                                          | 8.064516129                                      | 4.61E-04   | SPG7, KIF1A, OPA1, UCHL1, SPG11                                                                                                           | 100             | 16651            | 13.64836066     | 0.576782478 | 0.046647443 | 0.78388932 |
| cellular catabolic process                                  | GO:0044248 | biological process           | 16                                                         | 25.80645161                                      | 4.63E-04   | ABCD1, HEXA, UCHL1, MTPAP, EXOSC3, GAN, ATP13A2, STUB1, PNPLA6, GLB1, CAPN1, AUH, GBA2, PSEN1, GALC, ABHD12                               | 1613            | 16651            | 2.707672294     | 0.578252657 | 0.044422504 | 0.78704917 |
| steroid metabolic process                                   | GO:0008202 | biological process           | 7                                                          | 11.29032258                                      | 4.64E-04   | CYP7B1, GBA2, NPC1, NPC2, CYP27A1, MECP2, STUB1                                                                                           | 276             | 16651            | 6.923081492     | 0.579076661 | 0.042342641 | 0.78882498 |
| neuromuscular process                                       | GO:0050905 | biological process           | 5                                                          | 8.064516129                                      | 4.79E-04   | OPA3, FXN, UCHL1, GRID2, MECP2                                                                                                            | 101             | 16651            | 13.51322837     | 0.590550369 | 0.041629678 | 0.81391634 |
| bile acid metabolic process                                 | GO:0008206 | biological process           | 4                                                          | 6.451612903                                      | 4.95E-04   | CYP7B1, GBA2, NPC1, CYP27A1                                                                                                               | 43              | 16651            | 25.39229889     | 0.602760015 | 0.041095991 | 0.84139405 |
| cellular lipid catabolic process                            | GO:0044242 | biological process           | 6                                                          | 9.677419355                                      | 5.08E-04   | GBA2, ABCD1, GALC, ABHD12, PNPLA6, AUH                                                                                                    | 183             | 16651            | 8.949744692     | 0.612192959 | 0.040348104 | 0.86320203 |
| lipid catabolic process                                     | GO:0016042 | biological process           | 7                                                          | 11.29032258                                      | 6.48E-04   | GBA2, ABCD1, GALC, PLA2G6, ABHD12, PNPLA6, AUH                                                                                            | 294             | 16651            | 6.49921936      | 0.700821454 | 0.049036674 | 1.09834516 |
| monocarboxylic acid metabolic process                       | GO:0032787 | biological process           | 9                                                          | 14.51612903                                      | 8.34E-04   | CYP7B1, GBA2, PLP1, NPC1, CYP27A1, FA2H, ABCD1, PDHX, AUH                                                                                 | 558             | 16651            | 4.402696986     | 0.788800247 | 0.060303225 | 1.41305893 |
| behavior                                                    | GO:0007610 | biological process           | 9                                                          | 14.51612903                                      | 0.00102428 | NPC1, FXN, PSEN1, KCNA2, UCHL1, MECP2, PLA2G6, ABHD12, PRNP                                                                               | 576             | 16651            | 4.265112705     | 0.851804057 | 0.07080024  | 1.73219725 |
| small molecule binding                                      | GO:0036094 | molecular function           | 20                                                         | 32.25806452                                      | 0.00129164 | SPG7, OPA1, ABCD1, MTPAP, TTPA, MECP2, DARS2, AFG3L2, ATP13A2, POLR3B, SETX, SDHA, KIF1C, NPC1, KIF1A, NPC2, MARS2, SPR, SCN8A, TUBB4A    | 2579            | 15429            | 2.099140834     | 0.36633979  | 0.36633979  | 1.75435755 |
| microtubule-based movement                                  | GO:0007018 | biological process           | 6                                                          | 9.677419355                                      | 0.00131179 | KIF1C, SPG7, KIF1A, OPA1, UCHL1, SPG11                                                                                                    | 226             | 16651            | 7.246917162     | 0.913315121 | 0.08659251  | 2.2133115  |
| mitochondrion organization                                  | GO:0007005 | biological process           | 10                                                         | 16.12903226                                      | 0.0016858  | OPA3, SPG7, OPA1, FXN, PLA2G6, POLR3A, DARS2, AFG3L2, ATP13A2, TTC19                                                                      | 773             | 16651            | 3.531270545     | 0.956859267 | 0.106188408 | 2.83584428 |
| adult behavior                                              | GO:0030534 | biological process           | 5                                                          | 8.064516129                                      | 0.00175199 | NPC1, FXN, UCHL1, MECP2, ABHD12                                                                                                           | 143             | 16651            | 9.544308151     | 0.961872805 | 0.106535989 | 2.94564313 |
| ion transport                                               | GO:0006811 | biological process           | 14                                                         | 22.58064516                                      | 0.00195235 | KCND3, KCNA2, ABCD1, AFG3L2, ATP13A2, SLC17A5, FXN, PSEN1, SLC2A1, GRID2, PLA2G6, SCN8A, PRNP, SLC25A15                                   | 1475            | 16651            | 2.590875243     | 0.973768455 | 0.114284736 | 3.27725749 |
| regulation of lipid metabolic process                       | GO:0019216 | biological process           | 6                                                          | 9.677419355                                      | 0.00422009 | OPA3, NPC2, PSAP, PLA2G6, PDHX, STUB1                                                                                                     | 296             | 16651            | 5.533119185     | 0.999621261 | 0.224424844 | 6.95694812 |
| autophagy                                                   | GO:0006914 | biological process           | 8                                                          | 12.90322581                                      | 0.00426129 | GFAP, NPC1, PSEN1, UCHL1, ARSA, POLR3A, ATP13A2, CAPN1                                                                                    | 570             | 16651            | 3.831118781     | 0.99964936  | 0.220121526 | 7.02256946 |
| nervous system development                                  | GO:0007399 | biological process           | 17                                                         | 27.41935484                                      | 0.00445199 | GFAP, SPG7, PLP1, OPA1, FA2H, KCNA2, UCHL1, MECP2, AFG3L2, SETX, SDHA, GBA2, PSEN1, GRID2, ARSA, SCN8A, SPG11                             | 2224            | 16651            | 2.086529956     | 0.99975459  | 0.222674675 | 7.3257205  |
| locomotory behavior                                         | GO:0007626 | biological process           | 5                                                          | 8.064516129                                      | 0.00495941 | NPC1, FXN, UCHL1, MECP2, ABHD12                                                                                                           | 191             | 16651            | 7.145738563     | 0.99990507  | 0.238467739 | 8.1278286  |
| myelination                                                 | GO:0042552 | biological process           | 4                                                          | 6.451612903                                      | 0.00530717 | PLP1, FA2H, SCN8A, AFG3L2                                                                                                                 | 98              | 16651            | 11.1415189      | 0.999950502 | 0.246664989 | 8.67376494 |

|                                                                                    |            |                    |    |             |            |                                                                                                                         |      |       |             |             |             |            |
|------------------------------------------------------------------------------------|------------|--------------------|----|-------------|------------|-------------------------------------------------------------------------------------------------------------------------|------|-------|-------------|-------------|-------------|------------|
| negative regulation of cell death                                                  | GO:0060548 | biological process | 10 | 16.12903226 | 0.00538763 | NPC1, OPA1, FXN, PSEN1, PSAP, MECP2, TTPA, PRNP, ATP13A2, SETX                                                          | 920  | 16651 | 2.967034925 | 0.999957427 | 0.243886526 | 8.79965138 |
| ensheathment of neurons                                                            | GO:0007272 | biological process | 4  | 6.451612903 | 0.00577088 | PLP1, FA2H, SCN8A, AFG3L2                                                                                               | 101  | 16651 | 10.8105827  | 0.999979236 | 0.252793313 | 9.39699607 |
| axon ensheathment                                                                  | GO:0008366 | biological process | 4  | 6.451612903 | 0.00577088 | PLP1, FA2H, SCN8A, AFG3L2                                                                                               | 101  | 16651 | 10.8105827  | 0.999979236 | 0.252793313 | 9.39699607 |
| hydrolase activity, hydrolyzing O-glycosyl compounds                               | GO:0004553 | molecular function | 4  | 6.451612903 | 0.00603298 | GBA2, HEXA, GALC, GLB1                                                                                                  | 102  | 15429 | 10.61506708 | 0.881884554 | 0.656320722 | 7.95261977 |
| nucleoside-triphosphatase activity                                                 | GO:0017111 | molecular function | 9  | 14.51612903 | 0.00664663 | KIF1C, SPG7, KIF1A, OPA1, ABCD1, AFG3L2, ATP13A2, TUBB4A, SETX                                                          | 777  | 15429 | 3.135338346 | 0.905020216 | 0.543742105 | 8.72777706 |
| organic anion transport                                                            | GO:0015711 | biological process | 6  | 9.677419355 | 0.00707381 | SLC17A5, PSEN1, ABCD1, SLC2A1, PLA2G6, SLC25A15                                                                         | 335  | 16651 | 4.888965011 | 0.999998196 | 0.293925882 | 11.4003436 |
| oxidation-reduction process                                                        | GO:0055114 | biological process | 10 | 16.12903226 | 0.00816159 | SDHA, CYP7B1, GLRX5, FXN, CYP27A1, FA2H, ABCD1, MECP2, SPR, AUH                                                         | 982  | 16651 | 2.779706855 | 0.999999766 | 0.323939423 | 13.0408839 |
| neuron development                                                                 | GO:0048666 | biological process | 10 | 16.12903226 | 0.00914328 | GBA2, PLP1, GFAP, OPA1, PSEN1, UCHL1, MECP2, AFG3L2, SPG11, SETX                                                        | 1000 | 16651 | 2.729672131 | 0.999999963 | 0.348062706 | 14.4968252 |
| regulation of membrane potential                                                   | GO:0042391 | biological process | 6  | 9.677419355 | 0.0091744  | KCND3, PSEN1, KCNA2, GRID2, MECP2, SCN8A                                                                                | 357  | 16651 | 4.587684254 | 0.999999965 | 0.342164015 | 14.5425995 |
| pyrophosphatase activity                                                           | GO:0016462 | molecular function | 9  | 14.51612903 | 0.00921161 | KIF1C, SPG7, KIF1A, OPA1, ABCD1, AFG3L2, ATP13A2, TUBB4A, SETX                                                          | 822  | 15429 | 2.963695736 | 0.961870525 | 0.558108948 | 11.9028228 |
| hydrolase activity, acting on acid anhydrides, in phosphorus-containing anhydrides | GO:0016818 | molecular function | 9  | 14.51612903 | 0.00934076 | KIF1C, SPG7, KIF1A, OPA1, ABCD1, AFG3L2, ATP13A2, TUBB4A, SETX                                                          | 824  | 15429 | 2.956502299 | 0.963585344 | 0.484468457 | 12.059948  |
| hydrolase activity, acting on acid anhydrides                                      | GO:0016817 | molecular function | 9  | 14.51612903 | 0.00947127 | KIF1C, SPG7, KIF1A, OPA1, ABCD1, AFG3L2, ATP13A2, TUBB4A, SETX                                                          | 826  | 15429 | 2.949343698 | 0.965240107 | 0.428723439 | 12.2184645 |
| regulation of mitochondrion organization                                           | GO:0010821 | biological process | 5  | 8.064516129 | 0.00959438 | OPA1, FXN, PLA2G6, POLR3A, ATP13A2                                                                                      | 231  | 16651 | 5.908381236 | 0.999999984 | 0.347949954 | 15.1581318 |
| organonitrogen compound catabolic process                                          | GO:1901565 | biological process | 6  | 9.677419355 | 0.00981492 | GBA2, HEXA, GALC, ABHD12, GLB1, AUH                                                                                     | 363  | 16651 | 4.511854762 | 0.999999999 | 0.347756801 | 15.4796887 |
| single-organism catabolic process                                                  | GO:0044712 | biological process | 9  | 14.51612903 | 0.00988448 | GBA2, ABCD1, GALC, PLA2G6, ABHD12, STUB1, PNPLA6, GLB1, AUH                                                             | 836  | 16651 | 2.938642246 | 0.999999991 | 0.343347402 | 15.5808732 |
| regulation of macroautophagy                                                       | GO:0016241 | biological process | 4  | 6.451612903 | 0.0101311  | NPC1, UCHL1, ATP13A2, CAPN1                                                                                             | 124  | 16651 | 8.805393971 | 0.999999994 | 0.343981748 | 15.9386841 |
| neuron projection development                                                      | GO:0031175 | biological process | 9  | 14.51612903 | 0.01093329 | PLP1, GFAP, OPA1, PSEN1, UCHL1, MECP2, AFG3L2, SPG11, SETX                                                              | 851  | 16651 | 2.886844792 | 0.999999999 | 0.359327468 | 17.0927174 |
| regulation of release of cytochrome c from mitochondria                            | GO:0090199 | biological process | 3  | 4.838709677 | 0.01096085 | OPA1, FXN, PLA2G6                                                                                                       | 44   | 16651 | 18.61140089 | 0.999999999 | 0.353943421 | 17.1320979 |
| hydrolase activity, acting on glycosyl bonds                                       | GO:0016798 | molecular function | 4  | 6.451612903 | 0.01146553 | GBA2, HEXA, GALC, GLB1                                                                                                  | 129  | 15429 | 8.393308854 | 0.982934811 | 0.440957994 | 14.6079939 |
| sterol metabolic process                                                           | GO:0016125 | biological process | 4  | 6.451612903 | 0.01151125 | CYP7B1, NPC1, NPC2, CYP27A1                                                                                             | 130  | 16651 | 8.398991173 | 1           | 0.361971168 | 17.9149025 |
| carbohydrate derivative binding                                                    | GO:0097367 | molecular function | 16 | 25.80645161 | 0.01187305 | GFAP, SPG7, OPA1, ABCD1, MTPAP, DARS2, AFG3L2, ATP13A2, POLR3B, GLB1, SETX, KIF1C, KIF1A, MARS2, SCN8A, TUBB4A          | 2241 | 15429 | 1.932595881 | 0.985246393 | 0.409646319 | 15.0888035 |
| response to inorganic substance                                                    | GO:0010035 | biological process | 7  | 11.29032258 | 0.01224667 | NPC1, FXN, PSAP, MECP2, PRNP, ATP13A2, SETX                                                                             | 534  | 16651 | 3.578221895 | 1           | 0.374058352 | 18.9499993 |
| cellular amino acid metabolic process                                              | GO:0006520 | biological process | 5  | 8.064516129 | 0.01254134 | MECP2, MARS2, DARS2, SLC25A15, AUH                                                                                      | 250  | 16651 | 5.459344262 | 1           | 0.375150925 | 19.3612774 |
| single-organism intracellular transport                                            | GO:1902582 | biological process | 8  | 12.90322581 | 0.01267302 | SPG7, KIF1A, NPC2, OPA1, PEX16, UCHL1, AFG3L2, SPG11                                                                    | 701  | 16651 | 3.115175043 | 1           | 0.372427736 | 19.5444416 |
| cation transmembrane transport                                                     | GO:0098655 | biological process | 8  | 12.90322581 | 0.01323262 | KCND3, PSEN1, KCNA2, PLA2G6, SCN8A, AFG3L2, PRNP, ATP13A2                                                               | 707  | 16651 | 3.088737914 | 1           | 0.37951176  | 20.318438  |
| carbohydrate derivative metabolic process                                          | GO:1901135 | biological process | 11 | 17.74193548 | 0.0137444  | SDHA, GBA2, NPC1, FXN, PSEN1, PSAP, HEXA, MECP2, ARSA, GALC, GLB1                                                       | 1258 | 16651 | 2.386835727 | 1           | 0.385213126 | 21.0201624 |
| ribonucleoside binding                                                             | GO:0032549 | molecular function | 14 | 22.58064516 | 0.01374877 | SPG7, OPA1, ABCD1, MTPAP, DARS2, AFG3L2, ATP13A2, POLR3B, SETX, KIF1C, KIF1A, MARS2, SCN8A, TUBB4A                      | 1854 | 15429 | 2.04400159  | 0.992455894 | 0.418996645 | 17.2696705 |
| nucleoside binding                                                                 | GO:0001882 | molecular function | 14 | 22.58064516 | 0.01416147 | SPG7, OPA1, ABCD1, MTPAP, DARS2, AFG3L2, ATP13A2, POLR3B, SETX, KIF1C, KIF1A, MARS2, SCN8A, TUBB4A                      | 1861 | 15429 | 2.036313244 | 0.993492061 | 0.395572317 | 17.7424841 |
| proprioception                                                                     | GO:0019230 | biological process | 2  | 3.225806452 | 0.01433711 | FXN, MECP2                                                                                                              | 4    | 16651 | 136.4836066 | 1           | 0.392382968 | 21.8255774 |
| neuron differentiation                                                             | GO:0030182 | biological process | 11 | 17.74193548 | 0.01461636 | GBA2, PLP1, GFAP, OPA1, PSEN1, UCHL1, GRID2, MECP2, AFG3L2, SPG11, SETX                                                 | 1270 | 16651 | 2.364282948 | 1           | 0.392710711 | 22.2023553 |
| cellular localization                                                              | GO:0051641 | biological process | 17 | 27.41935484 | 0.01610269 | SPG7, OPA1, UCHL1, EXOSC3, POLR3A, AFG3L2, ATP13A2, KIF1C, NPC1, KIF1A, SYNE1, NPC2, PSEN1, PEX16, GRID2, PLA2G6, SPG11 | 2548 | 16651 | 1.821209821 | 1           | 0.417287807 | 24.1791799 |
| neurogenesis                                                                       | GO:0022008 | biological process | 12 | 19.35483871 | 0.01624123 | GBA2, PLP1, GFAP, OPA1, PSEN1, FA2H, UCHL1, GRID2, MECP2, AFG3L2, SPG11, SETX                                           | 1489 | 16651 | 2.199870086 | 1           | 0.414441789 | 24.3610129 |
| organic hydroxy compound metabolic process                                         | GO:1901615 | biological process | 6  | 9.677419355 | 0.01639106 | CYP7B1, NPC1, NPC2, CYP27A1, MECP2, TTPA                                                                                | 413  | 16651 | 3.965625372 | 1           | 0.411898028 | 24.5572063 |
| single-organism cellular localization                                              | GO:1902580 | biological process | 10 | 16.12903226 | 0.01642088 | SPG7, NPC1, KIF1A, NPC2, OPA1, PSEN1, PEX16, UCHL1, AFG3L2, SPG11                                                       | 1101 | 16651 | 2.479266241 | 1           | 0.407150326 | 24.5961838 |
| nitrogen compound transport                                                        | GO:0071705 | biological process | 8  | 12.90322581 | 0.01674691 | SLC17A5, PSEN1, KCNA2, SLC2A1, MECP2, PLA2G6, ATP13A2, SLC25A15                                                         | 741  | 16651 | 2.947014447 | 1           | 0.408086566 | 25.0212277 |
| response to oxidative stress                                                       | GO:0006979 | biological process | 6  | 9.677419355 | 0.01686039 | FXN, PSEN1, PSAP, PRNP, ATP13A2, SETX                                                                                   | 416  | 16651 | 3.937027112 | 1           | 0.405077082 | 25.1686467 |
| protein maturation                                                                 | GO:0051604 | biological process | 5  | 8.064516129 | 0.01701994 | FXN, PSEN1, AFG3L2, STUB1, CAPN1                                                                                        | 274  | 16651 | 4.981153524 | 1           | 0.402991576 | 25.3754418 |
| neurological system process                                                        | GO:0050877 | biological process | 11 | 17.74193548 | 0.01791415 | OPA3, OPA1, FXN, PSEN1, KCNA2, UCHL1, GRID2, MECP2, PLA2G6, SCN8A, PRNP                                                 | 1311 | 16651 | 2.290342749 | 1           | 0.414066853 | 26.5245282 |
| carboxylic acid transport                                                          | GO:0046942 | biological process | 5  | 8.064516129 | 0.01806395 | SLC17A5, PSEN1, ABCD1, PLA2G6, SLC25A15                                                                                 | 279  | 16651 | 4.89188554  | 1           | 0.411770098 | 26.7153764 |
| cellular cation homeostasis                                                        | GO:0030003 | biological process | 7  | 11.29032258 | 0.01843893 | FXN, PSEN1, TTPA, PLA2G6, AFG3L2, PRNP, ATP13A2                                                                         | 585  | 16651 | 3.266274345 | 1           | 0.413405282 | 27.1910977 |
| release of cytochrome c from mitochondria                                          | GO:001836  | biological process | 3  | 4.838709677 | 0.01915325 | OPA1, FXN, PLA2G6                                                                                                       | 59   | 16651 | 13.8796888  | 1           | 0.4206732   | 28.0892879 |

|                                            |            |                    |    |             |            |                                                                                                                           |      |       |             |             |             |            |
|--------------------------------------------|------------|--------------------|----|-------------|------------|---------------------------------------------------------------------------------------------------------------------------|------|-------|-------------|-------------|-------------|------------|
| central nervous system development         | GO:007417  | biological process | 9  | 14.51612903 | 0.01916229 | GBA2, PLP1, GFAP, PSEN1, FA2H, UCHL1, GRID2, MECP2, ARSA                                                                  | 942  | 16651 | 2.607967004 | 1           | 0.416083456 | 28.100587  |
| response to transition metal nanoparticle  | GO:1990267 | biological process | 4  | 6.451612903 | 0.02031245 | FXN, ARSA, PRNP, ATP13A2                                                                                                  | 161  | 16651 | 6.781794115 | 1           | 0.430063982 | 29.5247188 |
| cellular ion homeostasis                   | GO:006873  | biological process | 7  | 11.29032258 | 0.02045908 | FXN, PSEN1, TTPA, PLA2G6, AFG3L2, PRNP, ATP13A2                                                                           | 599  | 16651 | 3.189934043 | 1           | 0.427718386 | 29.7043453 |
| regulation of cell death                   | GO:0010941 | biological process | 12 | 19.35483871 | 0.02093873 | NPC1, OPA1, FXN, PSEN1, PSAP, GRID2, MECP2, TTPA, PLA2G6, PRNP, ATP13A2, SETX                                             | 1546 | 16651 | 2.118762327 | 1           | 0.430608157 | 30.2889659 |
| nucleotide binding                         | GO:0000166 | molecular function | 16 | 25.80645161 | 0.02095895 | SPG7, OPA1, ABCD1, MTPAP, MECP2, DARS2, AFG3L2, ATP13A2, SETX, SDHA, KIF1C, KIF1A, MARS2, SPR, SCN8A, TUBB4A              | 2394 | 15429 | 1.809084114 | 0.999434128 | 0.493251396 | 25.1785308 |
| nucleoside phosphate binding               | GO:1901265 | molecular function | 16 | 25.80645161 | 0.02103233 | SPG7, OPA1, ABCD1, MTPAP, MECP2, DARS2, AFG3L2, ATP13A2, SETX, SDHA, KIF1C, KIF1A, MARS2, SPR, SCN8A, TUBB4A              | 2395 | 15429 | 1.808328755 | 0.999448903 | 0.464899113 | 25.2552852 |
| ATPase activity                            | GO:0016887 | molecular function | 6  | 9.677419355 | 0.02140164 | KIF1C, SPG7, KIF1A, ABCD1, AFG3L2, ATP13A2                                                                                | 440  | 15429 | 3.691148325 | 0.999517627 | 0.444254934 | 25.6404983 |
| axonal transport of mitochondrion          | GO:0019896 | biological process | 2  | 3.225806452 | 0.02142968 | OPA1, UCHL1                                                                                                               | 6    | 16651 | 90.98907104 | 1           | 0.43357759  | 30.8826035 |
| glycosylceramide catabolic process         | GO:0046477 | biological process | 2  | 3.225806452 | 0.02142968 | GBA2, GALC                                                                                                                | 6    | 16651 | 90.98907104 | 1           | 0.43357759  | 30.8826035 |
| ion transmembrane transport                | GO:0034220 | biological process | 9  | 14.51612903 | 0.02192842 | KCND3, PSEN1, KCNA2, GRID2, PLA2G6, SCN8A, AFG3L2, PRNP, ATP13A2                                                          | 966  | 16651 | 2.543172793 | 1           | 0.43656952  | 31.4807883 |
| astrocyte differentiation                  | GO:0048708 | biological process | 3  | 4.838709677 | 0.02296612 | PLP1, GFAP, MECP2                                                                                                         | 65   | 16651 | 12.59848676 | 1           | 0.447301836 | 32.7098274 |
| microtubule-based process                  | GO:0007017 | biological process | 7  | 11.29032258 | 0.02360082 | KIF1C, SPG7, KIF1A, OPA1, UCHL1, SPG11, TUBB4A                                                                            | 619  | 16651 | 3.086866707 | 1           | 0.451896018 | 33.451286  |
| synaptic signaling                         | GO:0099536 | biological process | 7  | 11.29032258 | 0.023766   | PLP1, GFAP, PSEN1, GRID2, MECP2, PLA2G6, SPG11                                                                            | 620  | 16651 | 3.08188789  | 1           | 0.449801241 | 33.6429876 |
| chemical synaptic transmission             | GO:0007268 | biological process | 7  | 11.29032258 | 0.023766   | PLP1, GFAP, PSEN1, GRID2, MECP2, PLA2G6, SPG11                                                                            | 620  | 16651 | 3.08188789  | 1           | 0.449801241 | 33.6429876 |
| trans-synaptic signaling                   | GO:0099537 | biological process | 7  | 11.29032258 | 0.023766   | PLP1, GFAP, PSEN1, GRID2, MECP2, PLA2G6, SPG11                                                                            | 620  | 16651 | 3.08188789  | 1           | 0.449801241 | 33.6429876 |
| anterograde trans-synaptic signaling       | GO:0098916 | biological process | 7  | 11.29032258 | 0.023766   | PLP1, GFAP, PSEN1, GRID2, MECP2, PLA2G6, SPG11                                                                            | 620  | 16651 | 3.08188789  | 1           | 0.449801241 | 33.6429876 |
| iron ion binding                           | GO:0005506 | molecular function | 4  | 6.451612903 | 0.0241525  | CYP7B1, FXN, CYP27A1, FA2H                                                                                                | 171  | 15429 | 6.331794398 | 0.999821421 | 0.46014945  | 28.5424179 |
| phosphatidylcholine metabolic process      | GO:0046470 | biological process | 3  | 4.838709677 | 0.0243011  | MECP2, PLA2G6, PNPLA6                                                                                                     | 67   | 16651 | 12.22241253 | 1           | 0.452861923 | 34.2604334 |
| cation transport                           | GO:0006812 | biological process | 9  | 14.51612903 | 0.02470543 | KCND3, SLC17A5, PSEN1, KCNA2, PLA2G6, SCN8A, AFG3L2, PRNP, ATP13A2                                                        | 988  | 16651 | 2.486543439 | 1           | 0.454062536 | 34.7234066 |
| peroxisomal membrane transport             | GO:0015919 | biological process | 2  | 3.225806452 | 0.02495712 | ABCD1, PEX16                                                                                                              | 7    | 16651 | 77.99063232 | 1           | 0.453190962 | 35.0100353 |
| regulation of chaperone-mediated autophagy | GO:1904714 | biological process | 2  | 3.225806452 | 0.02495712 | GFAP, ATP13A2                                                                                                             | 7    | 16651 | 77.99063232 | 1           | 0.453190962 | 35.0100353 |
| ATP-dependent protein binding              | GO:0043008 | molecular function | 2  | 3.225806452 | 0.02513656 | PLA2G6, PRNP                                                                                                              | 7    | 15429 | 77.33834586 | 0.999874929 | 0.450699034 | 29.4341478 |
| establishment of localization in cell      | GO:0051649 | biological process | 14 | 22.58064516 | 0.02569538 | SPG7, OPA1, UCHL1, POLR3A, AFG3L2, ATP13A2, KIF1C, SYNE1, KIF1A, NPC2, PSEN1, PEX16, PLA2G6, SPG11                        | 2020 | 16651 | 1.891851972 | 1           | 0.458751427 | 35.84398   |
| cellular component biogenesis              | GO:0044085 | biological process | 18 | 29.03225806 | 0.02652938 | KCND3, GFAP, OPA1, KCNA2, SACS, MECP2, EXOSC3, AFG3L2, STUB1, SETX, TTC19, FXN, PSEN1, SLC2A1, PEX16, PLA2G6, PRNP, VAMP1 | 2928 | 16651 | 1.67807713  | 1           | 0.465351571 | 36.7739629 |
| macromolecule catabolic process            | GO:0009057 | biological process | 10 | 16.12903226 | 0.02655214 | PSEN1, HEXA, UCHL1, MTPAP, EXOSC3, GAN, ATP13A2, STUB1, GLB1, CAPN1                                                       | 1196 | 16651 | 2.282334558 | 1           | 0.461492166 | 36.7991534 |
| generation of neurons                      | GO:0048699 | biological process | 11 | 17.74193548 | 0.02660021 | GBA2, PLP1, GFAP, OPA1, PSEN1, UCHL1, GRID2, MECP2, AFG3L2, SPG11, SETX                                                   | 1397 | 16651 | 2.149348135 | 1           | 0.458020485 | 36.8523515 |
| cofactor biosynthetic process              | GO:0051188 | biological process | 4  | 6.451612903 | 0.02673119 | FXN, MMADHC, SPR, PDHX                                                                                                    | 179  | 16651 | 6.099825991 | 1           | 0.455652661 | 36.9970781 |
| lipid transport                            | GO:0006869 | biological process | 5  | 8.064516129 | 0.02730767 | NPC1, NPC2, PSAP, ABCD1, PLA2G6                                                                                           | 317  | 16651 | 4.305476548 | 1           | 0.458855076 | 37.6303501 |
| anion transport                            | GO:0006820 | biological process | 6  | 9.677419355 | 0.02754093 | SLC17A5, PSEN1, ABCD1, SLC2A1, PLA2G6, SLC25A15                                                                           | 473  | 16651 | 3.462586213 | 1           | 0.457789223 | 37.8848826 |
| carbohydrate derivative catabolic process  | GO:1901136 | biological process | 4  | 6.451612903 | 0.02789492 | GBA2, HEXA, GALC, GLB1                                                                                                    | 182  | 16651 | 5.999279409 | 1           | 0.458206344 | 38.2692908 |
| channel activity                           | GO:0015267 | molecular function | 6  | 9.677419355 | 0.02836335 | KCND3, PSEN1, KCNA2, GRID2, SCN8A, GJC2                                                                                   | 474  | 15429 | 3.426382412 | 0.999961196 | 0.469965038 | 32.5663831 |
| passive transmembrane transporter activity | GO:0022803 | molecular function | 6  | 9.677419355 | 0.02858756 | KCND3, PSEN1, KCNA2, GRID2, SCN8A, GJC2                                                                                   | 475  | 15429 | 3.419168975 | 0.999964232 | 0.452428657 | 32.7791609 |
| monocarboxylic acid biosynthetic process   | GO:0072330 | biological process | 4  | 6.451612903 | 0.02868561 | CYP7B1, PLP1, CYP27A1, FA2H                                                                                               | 184  | 16651 | 5.93406985  | 1           | 0.463801227 | 39.1198576 |
| cation homeostasis                         | GO:0055080 | biological process | 7  | 11.29032258 | 0.0302444  | FXN, PSEN1, TTPA, PLA2G6, AFG3L2, PRNP, ATP13A2                                                                           | 656  | 16651 | 2.912759896 | 1           | 0.478042931 | 40.7644557 |
| purine ribonucleoside triphosphate binding | GO:0035639 | molecular function | 13 | 20.96774194 | 0.03026718 | KIF1C, SPG7, KIF1A, OPA1, ABCD1, MTPAP, MARS2, SCN8A, DARS2, AFG3L2, ATP13A2, TUBB4A, SETX                                | 1841 | 15429 | 1.911403985 | 0.999980583 | 0.452690868 | 34.3534591 |
| glial cell differentiation                 | GO:0010001 | biological process | 4  | 6.451612903 | 0.03030266 | PLP1, GFAP, FA2H, MECP2                                                                                                   | 188  | 16651 | 5.807813045 | 1           | 0.474876766 | 40.8251073 |
| purine ribonucleoside binding              | GO:0032550 | molecular function | 13 | 20.96774194 | 0.03140932 | KIF1C, SPG7, KIF1A, OPA1, ABCD1, MTPAP, MARS2, SCN8A, DARS2, AFG3L2, ATP13A2, TUBB4A, SETX                                | 1851 | 15429 | 1.901077654 | 0.999987191 | 0.44728524  | 35.4043799 |
| purine nucleoside binding                  | GO:0001883 | molecular function | 13 | 20.96774194 | 0.03175807 | KIF1C, SPG7, KIF1A, OPA1, ABCD1, MTPAP, MARS2, SCN8A, DARS2, AFG3L2, ATP13A2, TUBB4A, SETX                                | 1854 | 15429 | 1.898001476 | 0.99998872  | 0.434261739 | 35.7221549 |
| cellular homeostasis                       | GO:0019725 | biological process | 8  | 12.90322581 | 0.03280392 | GLRX5, FXN, PSEN1, TTPA, PLA2G6, AFG3L2, PRNP, ATP13A2                                                                    | 852  | 16651 | 2.563072424 | 1           | 0.498638844 | 43.3745032 |
| inorganic ion homeostasis                  | GO:0098771 | biological process | 7  | 11.29032258 | 0.03325805 | FXN, PSEN1, TTPA, PLA2G6, AFG3L2, PRNP, ATP13A2                                                                           | 671  | 16651 | 2.847646038 | 1           | 0.499654362 | 43.8261322 |
| cellular transition metal ion homeostasis  | GO:0046916 | biological process | 3  | 4.838709677 | 0.03449059 | FXN, PRNP, ATP13A2                                                                                                        | 81   | 16651 | 10.10989678 | 1           | 0.508731039 | 45.0348651 |

|                                               |            |                    |    |             |            |                                                                                            |      |       |             |             |             |            |
|-----------------------------------------------|------------|--------------------|----|-------------|------------|--------------------------------------------------------------------------------------------|------|-------|-------------|-------------|-------------|------------|
| glial cell development                        | GO:0021782 | biological process | 3  | 4.838709677 | 0.03449059 | PLP1, GFAP, FA2H                                                                           | 81   | 16651 | 10.10989678 | 1           | 0.508731039 | 45.0348651 |
| cellular metal ion homeostasis                | GO:0006875 | biological process | 6  | 9.677419355 | 0.03509182 | FXN, PSEN1, PLA2G6, AFG3L2, PRNP, ATP13A2                                                  | 505  | 16651 | 3.243174809 | 1           | 0.511100804 | 45.6155533 |
| organic hydroxy compound transport            | GO:0015850 | biological process | 4  | 6.451612903 | 0.03543774 | NPC1, NPC2, KCNA2, MECP2                                                                   | 200  | 16651 | 5.459344262 | 1           | 0.510853249 | 45.9470381 |
| purine ribonucleotide binding                 | GO:0032555 | molecular function | 13 | 20.96774194 | 0.03553036 | KIF1C, SPG7, KIF1A, OPA1, ABCD1, MTPAP, MARS2, SCN8A, DARS2, AFG3L2, ATP13A2, TUBB4A, SETX | 1885 | 15429 | 1.866787659 | 0.999997156 | 0.455625    | 39.0680188 |
| ATP-dependent peptidase activity              | GO:0004176 | molecular function | 2  | 3.225806452 | 0.03571843 | SPG7, AFG3L2                                                                               | 10   | 15429 | 54.13684211 | 0.999997346 | 0.442116085 | 39.2305254 |
| sensory perception of pain                    | GO:0019233 | biological process | 3  | 4.838709677 | 0.03606108 | KCNA2, UCHL1, MECP2                                                                        | 83   | 16651 | 9.866284811 | 1           | 0.51336582  | 46.5395599 |
| lipid localization                            | GO:0010876 | biological process | 5  | 8.064516129 | 0.03629678 | NPC1, NPC2, PSAP, ABCD1, PLA2G6                                                            | 347  | 16651 | 3.933245146 | 1           | 0.512022425 | 46.7620105 |
| purine nucleotide binding                     | GO:0017076 | molecular function | 13 | 20.96774194 | 0.03720572 | KIF1C, SPG7, KIF1A, OPA1, ABCD1, MTPAP, MARS2, SCN8A, DARS2, AFG3L2, ATP13A2, TUBB4A, SETX | 1898 | 15429 | 1.854001442 | 0.999998461 | 0.441176027 | 40.5015834 |
| chemical homeostasis                          | GO:0048878 | biological process | 9  | 14.51612903 | 0.03725355 | NPC1, NPC2, FXN, PSEN1, TTPA, PLA2G6, AFG3L2, PRNP, ATP13A2                                | 1070 | 16651 | 2.295985905 | 1           | 0.517689223 | 47.6560845 |
| ribonucleotide binding                        | GO:0032553 | molecular function | 13 | 20.96774194 | 0.03760035 | KIF1C, SPG7, KIF1A, OPA1, ABCD1, MTPAP, MARS2, SCN8A, DARS2, AFG3L2, ATP13A2, TUBB4A, SETX | 1901 | 15429 | 1.851075611 | 0.999998668 | 0.430902693 | 40.8346726 |
| ceramide metabolic process                    | GO:0006672 | biological process | 3  | 4.838709677 | 0.03765886 | GBA2, GALC, PLA2G6                                                                         | 85   | 16651 | 9.634136933 | 1           | 0.517961346 | 48.0305545 |
| cellular response to hydrogen peroxide        | GO:0070301 | biological process | 3  | 4.838709677 | 0.03765886 | FXN, PSAP, SETX                                                                            | 85   | 16651 | 9.634136933 | 1           | 0.517961346 | 48.0305545 |
| regulation of postsynaptic membrane potential | GO:0060078 | biological process | 3  | 4.838709677 | 0.03765886 | GRID2, MECP2, SCN8A                                                                        | 85   | 16651 | 9.634136933 | 1           | 0.517961346 | 48.0305545 |
| outward rectifier potassium channel activity  | GO:0015271 | molecular function | 2  | 3.225806452 | 0.03922059 | KCND3, KCNA2                                                                               | 11   | 15429 | 49.215311   | 0.999999265 | 0.431609949 | 42.1842318 |
| response to metal ion                         | GO:0010038 | biological process | 5  | 8.064516129 | 0.04032029 | NPC1, FXN, MECP2, PRNP, ATP13A2                                                            | 359  | 16651 | 3.80177177  | 1           | 0.539054322 | 50.4275316 |
| amino acid transport                          | GO:0006865 | biological process | 3  | 4.838709677 | 0.04093447 | SLC17A5, PSEN1, SLC25A15                                                                   | 89   | 16651 | 9.201142015 | 1           | 0.540978046 | 50.9657154 |
| ATP binding                                   | GO:0005524 | molecular function | 11 | 17.74193548 | 0.04110996 | KIF1C, SPG7, KIF1A, ABCD1, MTPAP, MARS2, SCN8A, DARS2, AFG3L2, ATP13A2, SETX               | 1496 | 15429 | 1.990325077 | 0.999999633 | 0.434442868 | 43.7218992 |
| glycerophospholipid catabolic process         | GO:0046475 | biological process | 2  | 3.225806452 | 0.04240762 | ABHD12, PNPLA6                                                                             | 12   | 16651 | 45.49453552 | 1           | 0.550357422 | 52.2342277 |
| keratan sulfate catabolic process             | GO:0042340 | biological process | 2  | 3.225806452 | 0.04240762 | HEXA, GLB1                                                                                 | 12   | 16651 | 45.49453552 | 1           | 0.550357422 | 52.2342277 |
| glycosphingolipid catabolic process           | GO:0046479 | biological process | 2  | 3.225806452 | 0.04240762 | GBA2, GALC                                                                                 | 12   | 16651 | 45.49453552 | 1           | 0.550357422 | 52.2342277 |
| ion homeostasis                               | GO:0050801 | biological process | 7  | 11.29032258 | 0.04247954 | FXN, PSEN1, TTPA, PLA2G6, AFG3L2, PRNP, ATP13A2                                            | 712  | 16651 | 2.683666421 | 1           | 0.547441328 | 52.2953619 |
| ammonium ion metabolic process                | GO:0097164 | biological process | 3  | 4.838709677 | 0.04345945 | MECP2, PLA2G6, PNPLA6                                                                      | 92   | 16651 | 8.901104775 | 1           | 0.552312642 | 53.1209768 |
| microtubule binding                           | GO:0008017 | molecular function | 4  | 6.451612903 | 0.04413197 | KIF1C, KIF1A, OPA1, PRNP                                                                   | 217  | 15429 | 4.989570701 | 0.99999988  | 0.445730231 | 46.1027543 |
| fatty acid metabolic process                  | GO:0006631 | biological process | 5  | 8.064516129 | 0.04422474 | PLP1, FA2H, ABCD1, PDHX, AUH                                                               | 370  | 16651 | 3.688746123 | 1           | 0.55526215  | 53.7563943 |
| central nervous system myelination            | GO:0022010 | biological process | 2  | 3.225806452 | 0.04586068 | PLP1, FA2H                                                                                 | 13   | 16651 | 41.99495586 | 1           | 0.565234642 | 55.0876195 |
| axon ensheathment in central nervous system   | GO:0032291 | biological process | 2  | 3.225806452 | 0.04586068 | PLP1, FA2H                                                                                 | 13   | 16651 | 41.99495586 | 1           | 0.565234642 | 55.0876195 |
| adenyl ribonucleotide binding                 | GO:0032559 | molecular function | 11 | 17.74193548 | 0.04732624 | KIF1C, SPG7, KIF1A, ABCD1, MTPAP, MARS2, SCN8A, DARS2, AFG3L2, ATP13A2, SETX               | 1533 | 15429 | 1.942287225 | 0.999999963 | 0.457316567 | 48.5175839 |
| cell projection organization                  | GO:0030030 | biological process | 10 | 16.12903226 | 0.04772801 | PLP1, GFAP, OPA1, PSEN1, UCHL1, GRID2, MECP2, AFG3L2, SPG11, SETX                          | 1331 | 16651 | 2.050843074 | 1           | 0.576653196 | 56.5630183 |
| cellular chemical homeostasis                 | GO:0055082 | biological process | 7  | 11.29032258 | 0.04777645 | FXN, PSEN1, TTPA, PLA2G6, AFG3L2, PRNP, ATP13A2                                            | 733  | 16651 | 2.606781026 | 1           | 0.573598454 | 56.6006749 |
| adenyl nucleotide binding                     | GO:0030554 | molecular function | 11 | 17.74193548 | 0.04929298 | KIF1C, SPG7, KIF1A, ABCD1, MTPAP, MARS2, SCN8A, DARS2, AFG3L2, ATP13A2, SETX               | 1544 | 15429 | 1.928449686 | 0.999999982 | 0.459525342 | 49.9541158 |
| ceramide catabolic process                    | GO:0046514 | biological process | 2  | 3.225806452 | 0.0493015  | GBA2, GALC                                                                                 | 14   | 16651 | 38.99531616 | 1           | 0.581940188 | 57.7707145 |
| glycolipid catabolic process                  | GO:0019377 | biological process | 2  | 3.225806452 | 0.0493015  | GBA2, GALC                                                                                 | 14   | 16651 | 38.99531616 | 1           | 0.581940188 | 57.7707145 |
| glycosylceramide metabolic process            | GO:0006677 | biological process | 2  | 3.225806452 | 0.0493015  | GBA2, GALC                                                                                 | 14   | 16651 | 38.99531616 | 1           | 0.581940188 | 57.7707145 |
| protein autoprocessing                        | GO:0016540 | biological process | 2  | 3.225806452 | 0.0493015  | FXN, CAPN1                                                                                 | 14   | 16651 | 38.99531616 | 1           | 0.581940188 | 57.7707145 |
